# Supplementary material for: scLink: Inferring Sparse Gene Co-expression Networks from Single-cell Expression Data
Source: PubMed Central journal article supplement (PMC8896229; doi:10.1016/j.gpb.2020.11.006), 2021-07-10

A

**Significance of 453 edges in normal cells**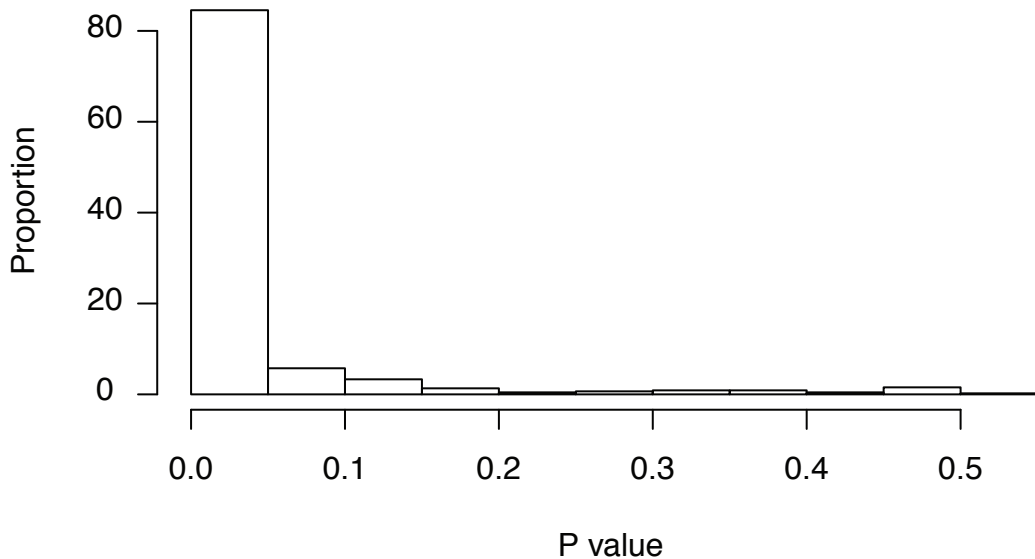

B

**Significance of 1384 edges in tumor cells**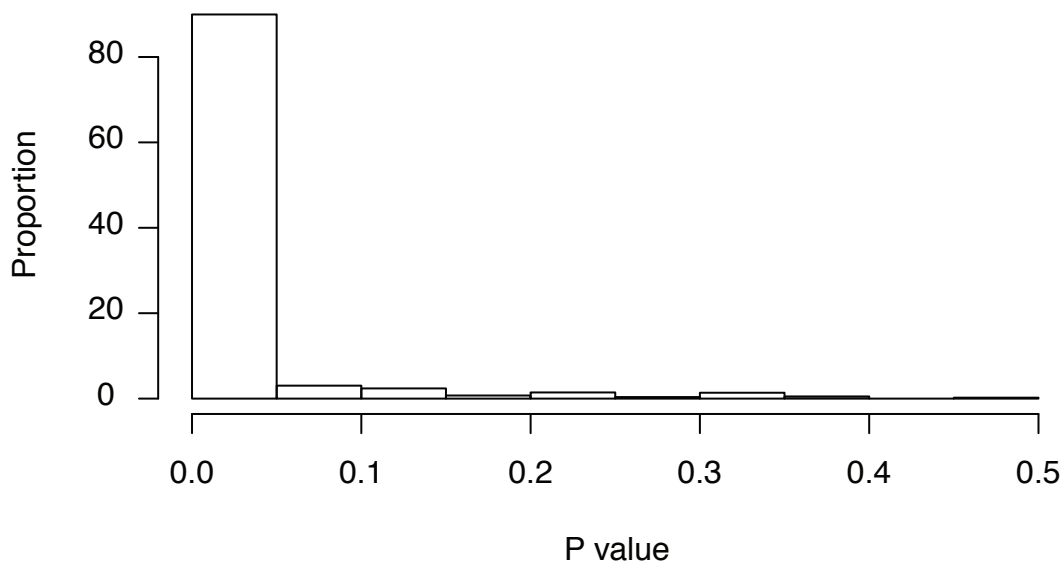

Supplement: mmc7.pdf [file mmc7.pdf]
