# Supplementary material for: scLink: Inferring Sparse Gene Co-expression Networks from Single-cell Expression Data
Source: PubMed Central journal article supplement (PMC8896229; doi:10.1016/j.gpb.2020.11.006), 2021-07-10
Supplement: mmc10.pdf [file mmc10.pdf]

## Normal

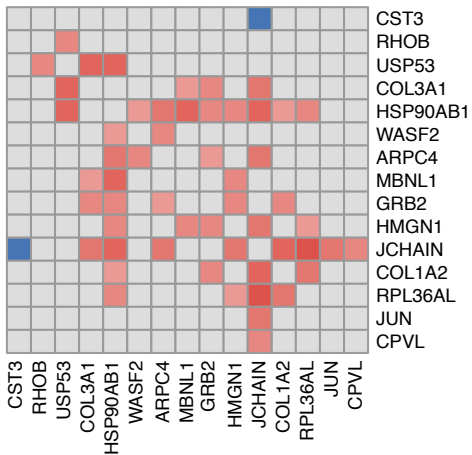

## Corrected correlation by scLink

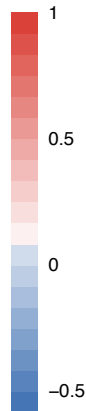

## Tumor

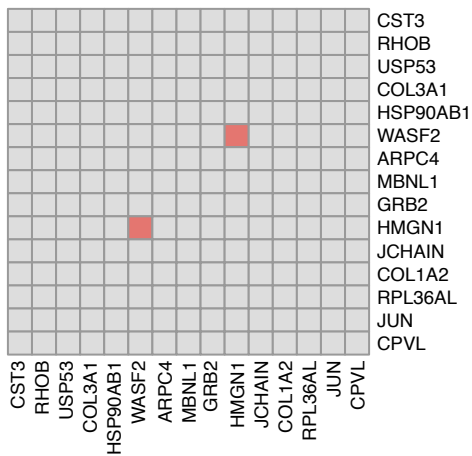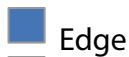

Edge

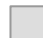

No edge
