# Supplementary material for: scLink: Inferring Sparse Gene Co-expression Networks from Single-cell Expression Data
Source: PubMed Central journal article supplement (PMC8896229; doi:10.1016/j.gpb.2020.11.006), 2021-07-10
Supplement: mmc12.pdf [file mmc12.pdf]

scLink's correlation

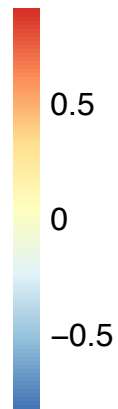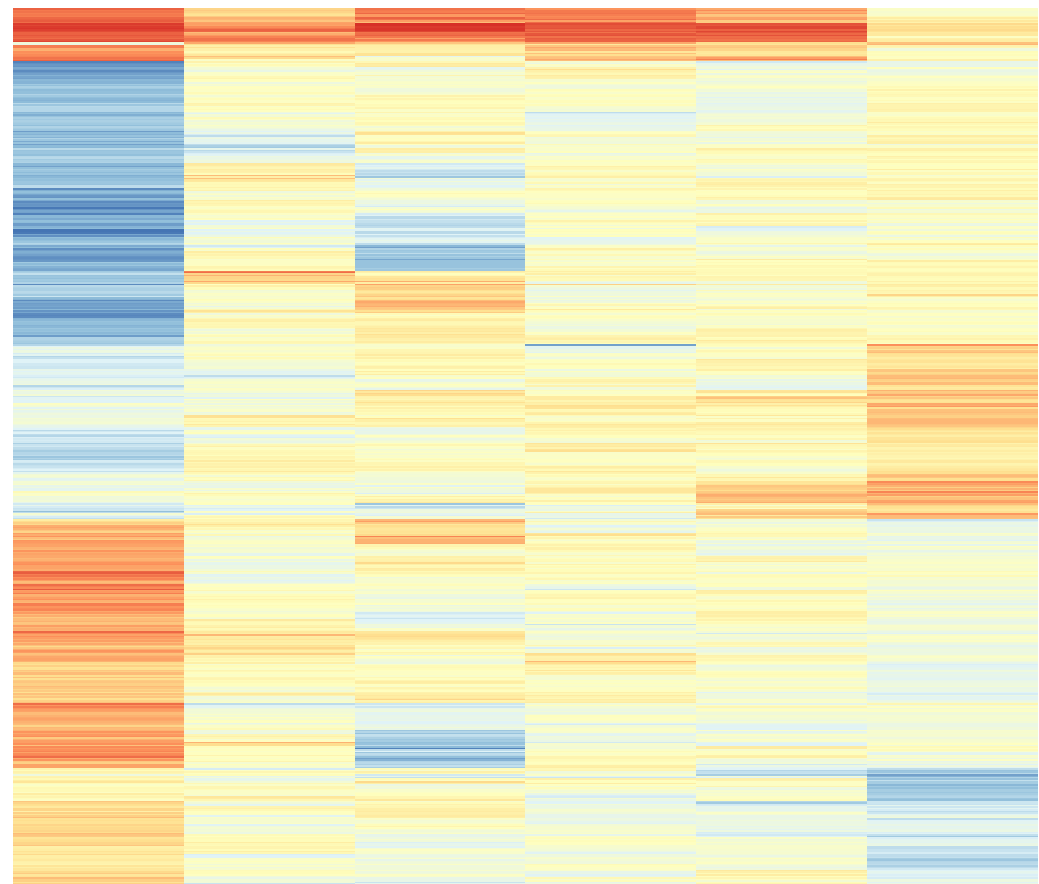

00h

12h

24h

36h

72h

96h
