# Supplementary material for: scLink: Inferring Sparse Gene Co-expression Networks from Single-cell Expression Data
Source: PubMed Central journal article supplement (PMC8896229; doi:10.1016/j.gpb.2020.11.006), 2021-07-10
Supplement: mmc13.pdf [file mmc13.pdf]

A

| <b>GO ID</b> | <b><i>P</i> value</b> | <b>Description</b>                                        |
|--------------|-----------------------|-----------------------------------------------------------|
| GO:0051304   | ***                   | chromosome separation                                     |
| GO:0007091   | ***                   | metaphase/anaphase transition of mitotic cell cycle       |
| GO:0010965   | ***                   | regulation of mitotic sister chromatid separation         |
| GO:0030071   | ***                   | regulation of mitotic metaphase/anaphase transition       |
| GO:0044784   | ***                   | metaphase/anaphase transition of cell cycle               |
| GO:0051306   | ***                   | mitotic sister chromatid separation                       |
| GO:1902099   | ***                   | regulation of metaphase/anaphase transition of cell cycle |
| GO:1905818   | ***                   | regulation of chromosome separation                       |
| GO:0033047   | ***                   | regulation of mitotic sister chromatid segregation        |
| GO:0007093   | ***                   | mitotic cell cycle checkpoint                             |
| GO:0000070   | ***                   | mitotic sister chromatid segregation                      |
| GO:0044772   | ***                   | mitotic cell cycle phase transition                       |
| GO:0000075   | ***                   | cell cycle checkpoint                                     |
| GO:0000819   | ***                   | sister chromatid segregation                              |
| GO:0033045   | ***                   | regulation of sister chromatid segregation                |
| GO:0044770   | ***                   | cell cycle phase transition                               |

B

| <b>GO ID</b> | <b><i>P</i> value</b> | <b>Description</b>                                 |
|--------------|-----------------------|----------------------------------------------------|
| GO:0048708   | ***                   | astrocyte differentiation                          |
| GO:0034405   | **                    | response to fluid shear stress                     |
| GO:0050793   | **                    | regulation of developmental process                |
| GO:0051239   | **                    | regulation of multicellular organismal process     |
| GO:2000026   | **                    | regulation of multicellular organismal development |
| GO:0045595   | **                    | regulation of cell differentiation                 |
| GO:0003008   | **                    | system process                                     |
| GO:0006814   | *                     | sodium ion transport                               |
| GO:0010001   | *                     | glial cell differentiation                         |
| GO:0045667   | *                     | regulation of osteoblast differentiation           |

\* *P* value < 0.01, \*\* *P* value < 0.001, *P* value < 0.0001
