# Supplementary material for: scLink: Inferring Sparse Gene Co-expression Networks from Single-cell Expression Data
Source: PubMed Central journal article supplement (PMC8896229; doi:10.1016/j.gpb.2020.11.006), 2021-07-10
Supplement: mmc14.pdf [file mmc14.pdf]

A

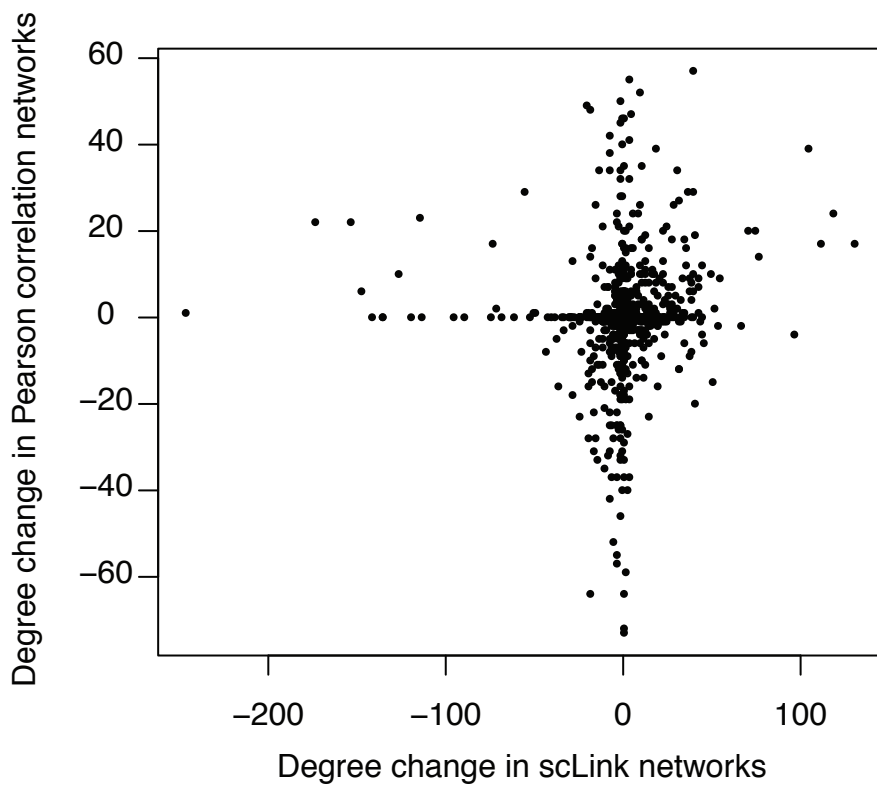

B

| GO ID      | P value | Description                                                         |
|------------|---------|---------------------------------------------------------------------|
| GO:0006614 | ***     | SRP-dependent cotranslational protein targeting to membrane         |
| GO:0000184 | ***     | nuclear-transcribed mRNA catabolic process, nonsense-mediated decay |
| GO:0006613 | ***     | cotranslational protein targeting to membrane                       |
| GO:0045047 | ***     | protein targeting to ER                                             |
| GO:0072599 | ***     | establishment of protein localization to endoplasmic reticulum      |
| GO:0006612 | ***     | protein targeting to membrane                                       |
| GO:0070972 | ***     | protein localization to endoplasmic reticulum                       |
| GO:0000956 | ***     | nuclear-transcribed mRNA catabolic process                          |
| GO:0006413 | ***     | translational initiation                                            |
| GO:0090150 | ***     | establishment of protein localization to membrane                   |

C

| GO ID      | P value | Description                                              |
|------------|---------|----------------------------------------------------------|
| GO:1900118 | ***     | negative regulation of execution phase of apoptosis      |
| GO:1900117 | **      | regulation of execution phase of apoptosis               |
| GO:1900115 | **      | extracellular regulation of signal transduction          |
| GO:1900116 | **      | extracellular negative regulation of signal transduction |
| GO:0097194 | *       | execution phase of apoptosis                             |

\*  $P$  value < 0.01, \*\*  $P$  value < 0.001,  $P$  value < 0.0001
