# Supplementary material for: scLink: Inferring Sparse Gene Co-expression Networks from Single-cell Expression Data
Source: PubMed Central journal article supplement (PMC8896229; doi:10.1016/j.gpb.2020.11.006), 2021-07-10

### Heatmap of scLink's correlation matrix

Here is an example showing the results available at this app. You can select your cell type and gene names of interest on the Figures page.

Example cell type:

T cell

Example gene names:

Hsp90b1 Canx Calr Tap2 H2-T23 Rhoa Tapbp H2-Q6 Pdia3

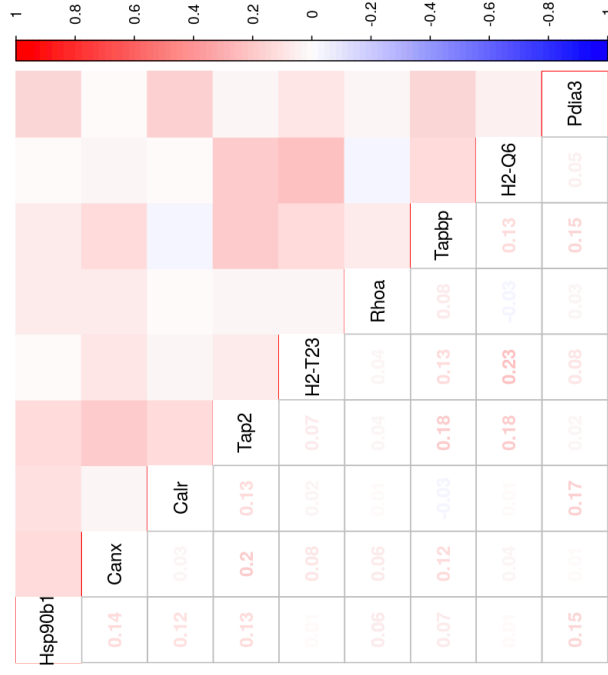

Supplement: mmc17.pdf [file mmc17.pdf]
